# Supplementary material
Source: PubMed Central journal article supplement (PMC3868250)
Supplement: Supp_Fig1.pdf [file Supp_Fig1.pdf]

## Supplementary Data

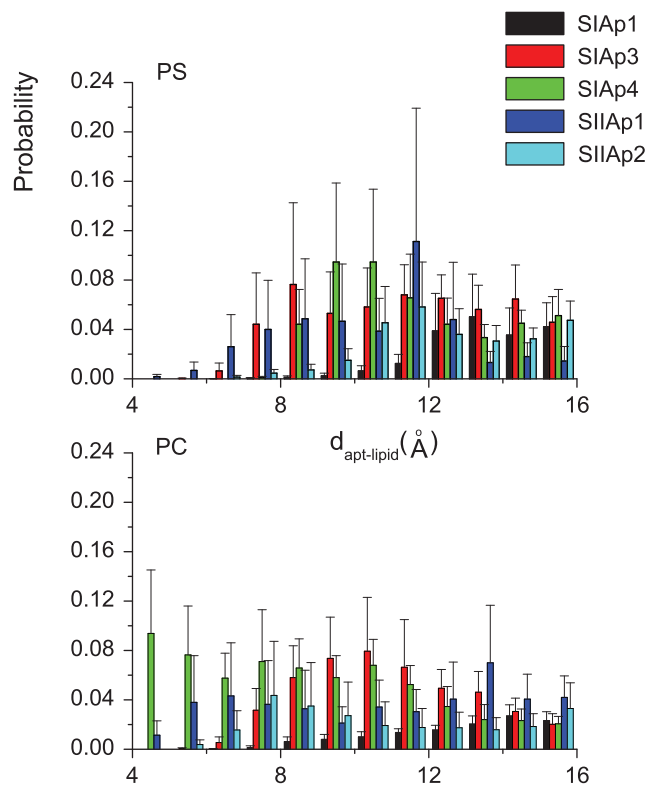

**SUPPLEMENTARY FIG. S1.** Probabilities of designed aptamers and lipid at a specific separation distance ( $d$ ). The histograms plot probabilities of designed aptamers away from phosphatidylserine (PS) at  $d_{\text{apt-PS}}$  distance (*upper panel*) and away from phosphatidylcholine (PC) at  $d_{\text{apt-PC}}$  (*lower panel*) during 10-nanosecond simulations. Note that all probability points are calculated within every consecutive 1Å interval.
