# Supplementary material
Source: PubMed Central journal article supplement (PMC3868250)
Supplement: Supp_Fig2.pdf [file Supp_Fig2.pdf]

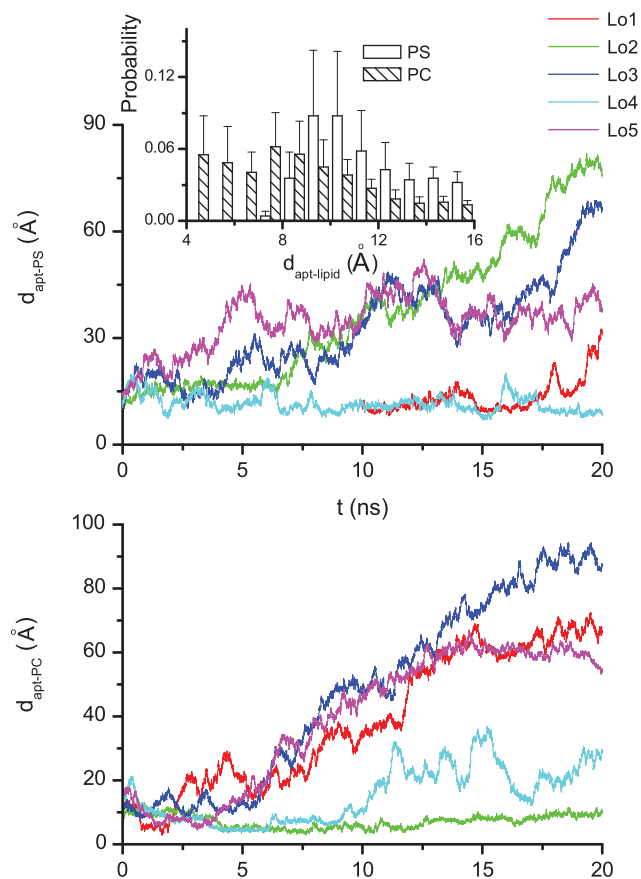

**SUPPLEMENTARY FIG. S2.** Twenty-nanosecond (ns) molecular dynamic simulations for SIAP4 case. Plots of 20-ns molecular dynamics results for both the SIAP4-PS (*upper panel*) and the SIAP4-PC (*lower panel*) complexes in terms of  $d_{\text{apt-lipid}}$  versus simulation time. The probabilities of designed aptamers away from PS and PC at a specific separation distance are shown in the *inset*. For the sake of clarity of presentation by avoiding overlap between two different types, two histograms (one for PS and one for PC) have been presented, where each has occupied 1 Å.
